# Supplementary material
Source: PubMed Central journal article supplement (PMC2796624)
Supplement: jlb.0309189_1.pdf [file jlb.0309189_1.pdf]

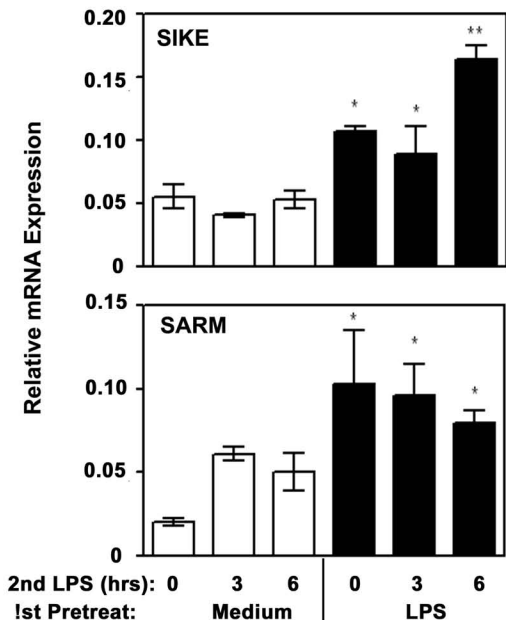

**Figure S1. Expression levels of SARM and SIKE mRNA in control and endotoxin-tolerant human monocytes treated with medium or re-stimulated with LPS.** After prior exposure for 20 h to medium or 10 ng/ml LPS, monocytes were washed and exposed to medium or 100 ng/ml LPS for the indicated time course. Following stimulation, RNA was isolated, reverse-transcribed and analyzed by real-time PCR with gene-specific primers for SARM, SIKE and HPRT. Results of a representative experiment (N=5) are depicted.

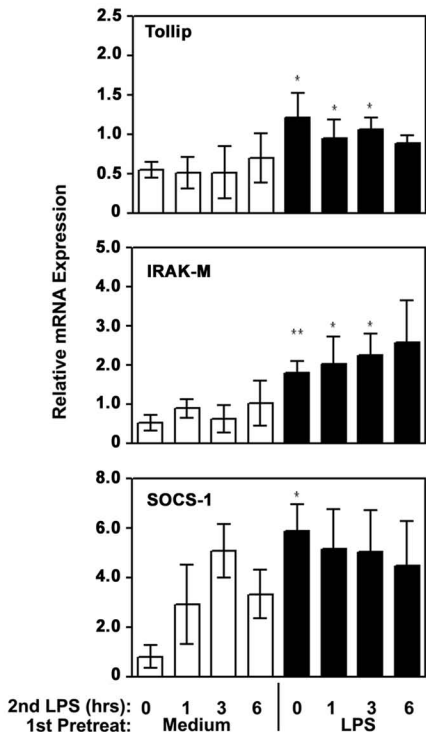

**Figure S2. LPS-inducible expression of Tollip, SOCS-1 and IRAK-M mRNA in control and endotoxin-tolerant human monocytes.** Cells were pretreated for 20 h with medium or 10 ng/ml LPS, washed and treated with medium or challenged with 100 ng/ml LPS for the indicated time periods. RNA was isolated, reverse-transcribed and subjected to real-time PCR analyses with gene-specific primers. Shown are results (mean  $\pm$  SEM) of a representative experiment. Similar data were obtained in two other experiments.

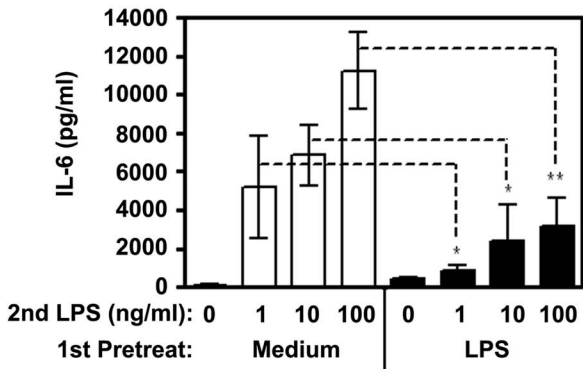

**Figure S3.** The effect of endotoxin tolerization of human monocytes on IL-6 secretion from human monocytes exposed to medium or challenged with LPS. Monocytes were pretreated for 20 h with medium or tolerized with 10 ng/ml LPS, washed and resuspended in fresh medium. Thereafter, cells were cultured with medium or subjected to stimulation with the indicated concentration of LPS, supernatants were collected 20 h post-stimulation, and levels of IL-6 were determined by ELISA. The data (mean  $\pm$  SD) of five experiments are shown.
